# Supplementary material for: The dynamic proliferation of CanSINEs mirrors the complex evolution of Feliforms
Source: BMC Evol Biol. 2014 Jun 20;14:137. doi: 10.1186/1471-2148-14-137 (PMC4084570; doi:10.1186/1471-2148-14-137)
Supplement: Additional file 6: Figure S2 — Six unique insertion events occurring at locus 212075. Alignment of six insertion events occurring at locus 212075 in the asian leopard cat lineage species of rusty spotted cat (P. rubiginosus), flat-headed cat (P. planiceps), Asian leopard cat (P. bengalensis); black-footed cat (F. nigripes); along with synapomorphies of the African golden cat clade (P. caracal/aurata), and the bay cat lineage. The homologous region without CanSINE from F. catus sequence in included as a reference. The insertions in the Asian leopard cat (P. bengalensis) and flat-headed cat (P. planiceps) are unfixed. Yellow-highlighted regions mark target site duplications and gray-shaded regions denote the A and B RNA polymerase III recognition sequences. [file 1471-2148-14-137-S6.pdf]

Consensus  
*F. catus*  
*P. planiceps* 1  
*P. planiceps* 2  
*P. bengalensis* 1  
*P. bengalensis* 2  
*P. rubiginosus*  
*P. caracal/aurata*  
Bay Cat Lineage  
*F. nigripes*

Consensus  
*F. catus*  
*P. planiceps* 1  
*P. planiceps* 2  
*P. bengalensis* 1  
*P. bengalensis* 2  
*P. rubiginosus*  
*P. caracal/aurata*  
Bay Cat Lineage  
*F. nigripes*

Consensus  
*F. catus*  
*P. planiceps* 1  
*P. planiceps* 2  
*P. bengalensis* 1  
*P. bengalensis* 2  
*P. rubiginosus*  
*P. caracal/aurata*  
Bay Cat Lineage  
*F. nigripes*
