# Supplementary material for: The dynamic proliferation of CanSINEs mirrors the complex evolution of Feliforms
Source: BMC Evol Biol. 2014 Jun 20;14:137. doi: 10.1186/1471-2148-14-137 (PMC4084570; doi:10.1186/1471-2148-14-137)
Supplement: Additional file 10: Figure S5 — Alignment of ocelot (Leopardus) lineage individuals at locus 133135. Alignment of ocelot (Leopardus) lineage individuals at locus 133135 reveals a Can-SINE insert in L. pardalis(N = 9) L. tigrina (N = 8), O. geoffroyi (N = 8) and O. guigna (N = 1) and L.jacobita (N = 1) individuals, yet absent from L. colocolo (N = 3) and L. wiedii (N = 2). Yellow-highlighted regions mark target site duplications and gray-shaded regions denote the A and B RNA polymerase III recognition sequences. [file 1471-2148-14-137-S10.pdf]

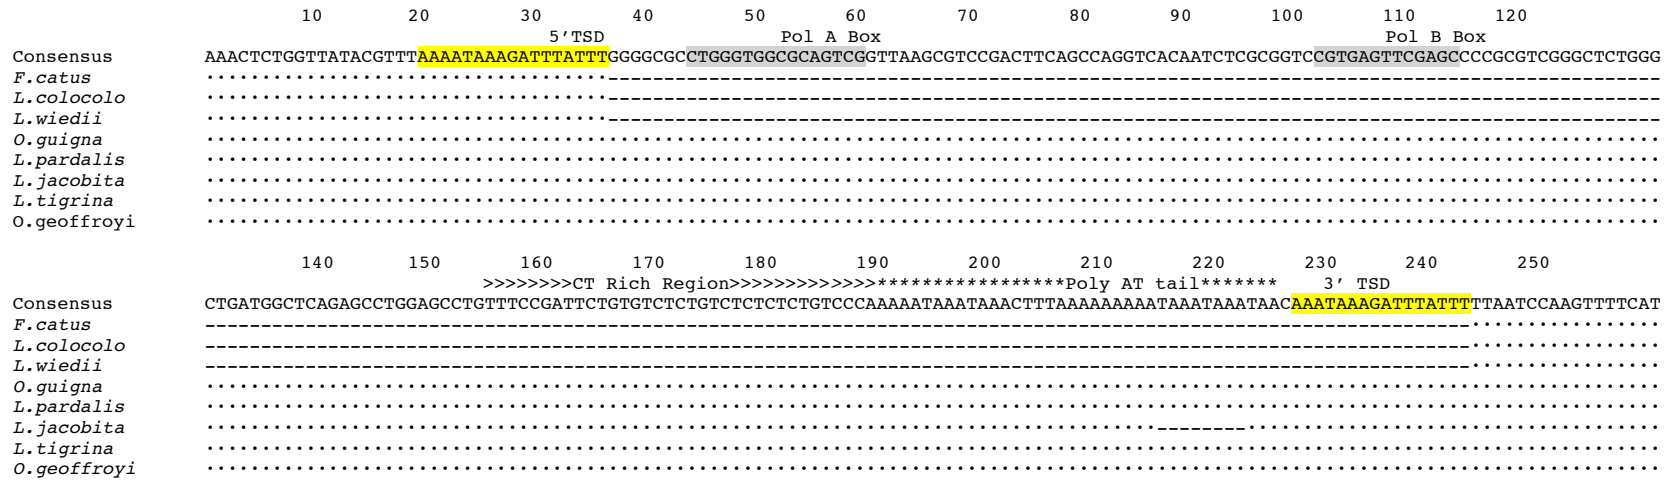

**Figure S5.** Alignment of Ocelot (*Leopardus*) lineage individuals at locus 133135 reveals, a Can-SINE insert in all 9 *L. pardalis*, 8 *L. tigrina*, 8 *O. geoffroyi* and each *O. guigna* and *L. jacobita* individuals examined, yet absent from all 3 *L. colocolo* and 2 *L. wiedii* individuals examined. Yellow-highlighted regions mark target site duplications and gray-shaded regions denote the A and B RNA polymerase III recognition sequences.
